# Supplementary material
Source: Research Square preprint supplement (doi:10.21203/rs.3.rs-8163864/v1)
Supplement: Supplementary file 1 [file 7ad14c32da83a670c004b328.pdf]

SUPPLEMENTARY TABLE S1

| Case ID | Centers (1) | Case Classification  | Gene Affected | Sex | Suspected Syndrome | Family History Polyps | Family History CRC or other cancer     | Polyps Type Classification | Polyps Count   | Polyps Histology                                 | Polyposis Age at diagnosis | 1st Cancer (Age at diagnosis) | 2nd Cancer (Age at Diagnosis) | Extracolonic Manifestations 1st type (Age at diagnosis) | Extracolonic Manifestations 2nd type (Age at diagnosis) |
|---------|-------------|----------------------|---------------|-----|--------------------|-----------------------|----------------------------------------|----------------------------|----------------|--------------------------------------------------|----------------------------|-------------------------------|-------------------------------|---------------------------------------------------------|---------------------------------------------------------|
| 002     | HGBU        | Patient              | APC           | M   | FAP                | Yes                   | No                                     | FAP                        | >1000          | No                                               | No                         | No                            | No                            | No                                                      | No                                                      |
| 004     | HGBU        | Patient              | APC           | M   | FAP                | Yes                   | Mother Uterus                          | FAP                        | Severe (>1000) | Adenoma                                          | 33                         | CRC (33)                      | No                            | Desmoid Tumor (33)                                      | Duodenal Adenomas                                       |
| 005     | HGBU        | Patient              | APC           | M   | FAP                | No                    | No                                     | FAP                        | Severe (>1000) | FAP                                              | 24                         | CRC (24)                      | No                            | No                                                      | Duodenal Adenomas                                       |
| 010     | HGBU        | Patient              | APC           | F   | FAP                | No                    | No                                     | FAP                        | Severe (>1000) | FAP                                              | 29                         | CRC (29)                      | No                            | No                                                      | Duodenal Adenomas                                       |
| 011     | HGBU        | Patient              | APC           | M   | FAP                | Yes                   | Yes                                    | FAP                        | Severe (>1000) | Adenomas                                         | 17                         | No                            | No                            | Desmoid Tumor                                           | OSTEOMA                                                 |
| 012     | HGBU        | Patient              | APC           | M   | FAP                | Yes                   | Uncle CRC                              | FAP                        | Severe (>1000) | FAP                                              | 15                         | No                            | No                            | No                                                      | No                                                      |
| 013     | HGBU        | Patient              | APC           | M   | FAP                | Yes                   | Father Sigmoid                         | FAP                        | Severe (>1000) | FAP                                              | 34                         | No                            | No                            | No                                                      | No                                                      |
| 014     | HGBU        | Patient              | APC           | M   | FAP                | No                    | No                                     | FAP                        | Severe (>1000) | FAP                                              | 17                         | No                            | No                            | No                                                      | No                                                      |
| 016     | HGBU        | Patient              | APC           | M   | FAP                | No                    | No                                     | FAP                        | Severe (>1000) | FAP                                              | 30                         | CRC (30)                      | No                            | Cancer Duodenum                                         | No                                                      |
| 020     | HGBU        | Patient              | APC           | F   | FAP                | Yes                   | Mother CRC                             | FAP                        | Severe (>1000) | FAP                                              | 35                         | No                            | No                            | Duodenal Adenomas                                       | No                                                      |
| 023     | HGBU        | Patient              | APC           | F   | FAP                | Yes                   | Yes                                    | FAP                        | Severe (>1000) | Adenomas                                         | 35                         | No                            | No                            | Gastric Polyps (35)                                     | Abdominal desmoid (36)                                  |
| 030     | HGBU        | Patient              | APC           | F   | FAP                | Yes                   | No                                     | FAP                        | Severe (>1000) | Adenomas                                         | 26                         | No                            | No                            | Duodenal Polyps (29)                                    | No                                                      |
| 031     | HGBU        | Patient              | APC           | F   | FAP                | No                    | No                                     | FAP                        | Severe (>1000) | Adenomas                                         | 21                         | No                            | No                            | No                                                      | No                                                      |
| 032     | HGBU        | Patient              | APC           | F   | FAP                | Yes                   | Yes                                    | FAP                        | Severe (>1000) | FAP                                              | 48                         | No                            | No                            | No                                                      | No                                                      |
| 033     | HGBU        | Patient              | APC           | F   | FAP                | Yes                   | Father CRC                             | FAP                        | Severe (>1000) | FAP                                              | 14                         | No                            | No                            | No                                                      | No                                                      |
| 034     | HGBU        | Patient              | APC           | M   | FAP                | Yes                   | Yes                                    | FAP                        | Severe (>1000) | FAP                                              | 14                         | No                            | No                            | No                                                      | No                                                      |
| 035     | HGBU        | Patient              | APC           | M   | FAP                | No                    | No                                     | FAP                        | Severe (>1000) | FAP                                              | 27                         | No                            | No                            | Soft Tissue (3)                                         | Desmoid (29)                                            |
| 040     | HGBU        | Patient              | APC           | M   | FAP                | No                    | No                                     | FAP                        | Severe (>1000) | FAP                                              | 34                         | CRC (34)                      | No                            | No                                                      | No                                                      |
| 042     | HGBU        | Patient              | APC           | F   | FAP                | No                    | Father CNS Cancer                      | AFAP                       | 20             | AFAP                                             | 56                         | No                            | No                            | No                                                      | No                                                      |
| 043     | HGBU        | Patient              | APC           | F   | FAP                | No                    | Aunt Uterus and CRC; Cousin: Thyroid   | FAP                        | Severe (>1000) | Adenomas                                         | 36                         | No                            | No                            | No                                                      | No                                                      |
| 045     | HGBU        | Patient              | APC           | F   | FAP                | Yes                   | Mother, Sister: Rectum cancer          | FAP                        | Severe (>1000) | Adenomas                                         | 17                         | No                            | No                            | Gastric Polyps (17)                                     | No                                                      |
| 047     | HGBU        | Patient              | APC           | M   | FAP                | Yes                   | Father CRC                             | Mixed/Attenuated           | Severe         | Serrated Adenomas                                | 26                         | CRC (60)                      | No                            | No                                                      | No                                                      |
| 050     | HGBU        | Patient              | APC           | F   | FAP                | Yes                   | Yes                                    | FAP                        | Severe (>1000) | Adenomas                                         | 22                         | No                            | No                            | LIPOMA (24)                                             | OSTEOMA (24)                                            |
| 052     | HGBU        | Patient              | APC           | F   | FAP                | Yes                   | Sister CRC                             | FAP                        | Severe (>1000) | Adenomas                                         | 15                         | No                            | No                            | No                                                      | No                                                      |
| 053     | HGBU        | Patient              | APC           | F   | FAP                | No                    | Mother CRC                             | FAP                        | Severe (>1000) | Adenomas                                         | 33                         | CRC (33)                      | No                            | No                                                      | No                                                      |
| 055     | HGBU        | Patient              | APC           | M   | FAP                | Yes                   | CRC                                    | FAP                        | Severe (>1000) | Adenomas                                         | 33                         | No                            | No                            | LIPOMA                                                  | No                                                      |
| 057     | HGBU        | Patient              | APC           | F   | FAP                | Yes                   | No                                     | AFAP / Mixed               | <100           | Hiperplastic Adenomas                            | 30                         | No                            | No                            | No                                                      | No                                                      |
| 058     | HGBU        | Patient              | APC           | F   | FAP                | Yes                   | Mother Rectum, Aunt Duodenum / Thyroid | FAP                        | Severe (>1000) | Adenomas                                         | 29                         | No                            | No                            | Gastric Polyps (30)                                     | No                                                      |
| 060     | HGBU        | Patient              | APC           | F   | FAP                | Yes                   | Yes                                    | FAP                        | Severe (>1000) | Adenomas                                         | 45                         | CRC (47)                      | No                            | Gastric Polyps (45)                                     | No                                                      |
| 069     | HGBU        | Patient              | APC           | F   | FAP                | No                    | No                                     | AFAP                       | <100           | Juvenile                                         | 22                         | No                            | No                            | No                                                      | No                                                      |
| 071     | HGBU        | Patient              | APC           | F   | FAP                | Yes                   | Yes                                    | AFAP                       | Severe (>1000) | Adenomas                                         | 24                         | No                            | No                            | No                                                      | No                                                      |
| 075     | HGBU        | Patient              | APC           | M   | FAP                | Yes                   | Yes                                    | FAP                        | Severe (>1000) | Adenomas                                         | 19                         | CRC (21)                      | No                            | No                                                      | No                                                      |
| 077     | HGBU        | Relative to case 033 | APC           | F   | FAP                | Yes                   | No                                     | FAP                        | Severe (>1000) | Adenomas                                         | 30                         | No                            | No                            | No                                                      | No                                                      |
| 079     | HIBA        | Patient              | APC           | M   | FAP                | Yes                   | No                                     | FAP                        | Severe (>1000) | Adenomas                                         | 37                         | Sarcoma (37)                  | No                            | Thyroid Cancer (40)                                     | No                                                      |
| 080     | HIBA        | Patient              | APC           | F   | FAP                | Yes                   | No                                     | FAP                        | Severe (>1000) | Adenomas                                         | 32                         | CRC (48)                      | CRC (32)                      | No                                                      | No                                                      |
| 081     | HIBA        | Patient              | APC           | F   | FAP                | Yes                   | Yes                                    | FAP                        | Severe (>1000) | Adenomas                                         | 42                         | CRC (42)                      | No                            | Desmoid Tumors (34, 36)                                 | Rectal and Anal Polyps (49)                             |
| 082     | HIBA        | Patient              | APC           | M   | FAP                | No                    | No                                     | FAP                        | Severe (>1000) | Adenomas                                         | 50                         | No                            | No                            | No                                                      | No                                                      |
| 083     | HIBA        | Patient              | APC           | M   | FAP                | Yes                   | Yes                                    | FAP                        | Severe (>1000) | Adenomas                                         | 50                         | No                            | No                            | No                                                      | No                                                      |
| 084     | HIBA        | Patient              | APC           | M   | FAP                | Yes                   | Yes                                    | FAP                        | Severe (>1000) | Adenoma High Dysplasia                           | 35                         | CRC (61)                      | No                            | No                                                      | No                                                      |
| 085     | HIBA        | Patient              | APC           | M   | FAP                | Yes                   | Yes                                    | FAP                        | Severe (>1000) | Hyperplastic Polyps; Adenoma Low Grade Dysplasia | 31                         | No                            | No                            | Desmoid Tumor (35)                                      | No                                                      |
| 086     | HIBA        | Patient              | APC           | F   | FAP                | No                    | No                                     | FAP                        | Severe (>1000) | Adenomas                                         | 37                         | No                            | No                            | Pancreatic (55)                                         | No                                                      |
| 087     | HIBA        | Patient              | APC           | F   | FAP                | Yes                   | Yes                                    | FAP                        | Severe (>1000) | Adenomas                                         | 37                         | No                            | No                            | No                                                      | No                                                      |
| 088     | HIBA        | Patient              | APC           | F   | FAP                | Yes                   | Yes                                    | FAP                        | Severe (>1000) | Adenomas                                         | 24                         | No                            | No                            | No                                                      | No                                                      |
| 089     | HIBA        | Patient              | APC           | M   | FAP                | Yes                   | Yes                                    | FAP                        | Severe (>1000) | Adenomas                                         | 15                         | No                            | No                            | No                                                      | No                                                      |
| 090     | HIBA        | Patient              | APC           | M   | FAP                | Yes                   | Yes                                    | FAP                        | Severe (>1000) | Adenomas                                         | 36                         | No                            | No                            | No                                                      | No                                                      |
| 091     | HIBA        | Patient              | APC           | F   | FAP                | Yes                   | Yes                                    | FAP                        | Severe (>1000) | Adenomas                                         | 17                         | No                            | No                            | Thyroid Cancer (35)                                     | No                                                      |
| 092     | HIBA        | Patient              | APC           | F   | FAP                | Yes                   | Yes                                    | FAP                        | Severe (>1000) | Adenomas                                         | 33                         | CRC (34)                      | Rectum Adenocarcinoma         | No                                                      | No                                                      |
| 093     | HIBA        | Patient              | APC           | M   | FAP                | Yes                   | Yes                                    | FAP                        | Severe (>1000) | Adenomas                                         | 20                         | No                            | No                            | No                                                      | No                                                      |
| 094     | HIBA        | Patient              | APC           | M   | FAP                | Yes                   | Yes                                    | AFAP                       | Severe (>1000) | Adenoma Low grade dysplasia                      | 26                         | No                            | No                            | No                                                      | No                                                      |
| 095     | HIBA        | Patient              | APC           | M   | FAP                | Yes                   | Yes                                    | FAP                        | Severe (>1000) | Adenoma High grade Dysplasia                     | 50                         | No                            | No                            | Gastric and Duodenal Polyps, low grade dysplasia (28)   | Adenoma of the ampulla of Vater (52)                    |
| 096     | HIBA        | Patient              | APC           | F   | FAP                | Yes                   | Yes                                    | FAP                        | Severe (>1000) | Adenoma High grade Dysplasia                     | 28                         | CRC (28)                      | No                            | Stomach Polyps (28)                                     | No                                                      |
| 097     | HIBA        | Patient              | APC           | F   | FAP                | Yes                   | Yes                                    | FAP                        | Severe (>1000) | Adenoma Low grade dysplasia                      | 12                         | No                            | No                            | No                                                      | No                                                      |
| 098     | HIBA        | Patient              | APC           | F   | FAP                | Yes                   | Yes                                    | FAP                        | Severe (>1000) | Adenomas                                         | 52                         | No                            | No                            | No                                                      | No                                                      |
| 099     | HIBA        | Patient              | APC           | F   | FAP                | Yes                   | Yes                                    | FAP                        | Severe (>1000) | Adenomas                                         | 29                         | No                            | No                            | No                                                      | No                                                      |
| 100     | HIBA        | Patient              | APC           | F   | FAP                | No                    | No                                     | FAP                        | Severe (>1000) | Adenomas                                         | 55                         | Breast Cancer (55)            | CRC (75)                      | No                                                      | No                                                      |
| 101     | HIBA        | Patient              | APC           | M   | FAP                | No                    | No                                     | FAP                        | Severe (>1000) | Adenomas                                         | 38                         | CRC (38)                      | No                            | No                                                      | No                                                      |
| 102     | HIBA        | Patient              | APC           | M   | FAP                | No                    | No                                     | FAP                        | Severe (>1000) | Adenomas                                         | 38                         | CRC (38)                      | No                            | No                                                      | No                                                      |
| 103     | HIBA        | Patient              | APC           | F   | FAP                | No                    | No                                     | FAP                        | Severe (>1000) | Adenomas                                         | 30                         | No                            | No                            | No                                                      | No                                                      |
| 104     | HIBA        | Patient              | APC           | M   | FAP                | Yes                   | Yes                                    | FAP                        | Severe (>1000) | Adenomas                                         | 30                         | No                            | No                            | No                                                      | No                                                      |
| 113     | HIBA        | Relative to case 095 | APC           | M   | FAP                | No                    | No                                     | FAP                        | Severe (>1000) | Adenomas                                         | 30                         | No                            | No                            | No                                                      | No                                                      |
| 115     | HIBA        | Patient              | APC           | F   | FAP                | Yes                   | Yes                                    | FAP                        | Severe (>1000) | Adenomas                                         | 32                         | No                            | No                            | No                                                      | No                                                      |
| 170     | HEC         | Patient              | APC           | F   | FAP                | Yes                   | Yes                                    | FAP                        | Severe (>1000) | Adenomas                                         | 18                         | No                            | No                            | Duodenal Adenomas (18)                                  | No                                                      |
| 171     | HEC         | Patient              | APC           | M   | FAP                | Yes                   | Yes                                    | FAP                        | Severe (>1000) | Adenomas                                         | 23                         | No                            | No                            | Duodenal Adenomas (30)                                  | No                                                      |
| 173     | HEC         | Patient              | APC           | M   | FAP                | Yes                   | Yes                                    | FAP                        | Severe (>1000) | Adenomas                                         | 15                         | No                            | No                            | Duodenal Adenomas (29)                                  | Fundic Gland Polyps (26)                                |
| 174     | HEC         | Patient              | APC           | F   | FAP                | Yes                   | Yes                                    | FAP                        | Severe (>1000) | Adenomas                                         | 12                         | No                            | No                            | Duodenal Adenomas (13)                                  | Fundic Gland Polyps (13)                                |
| 179     | HEC         | Patient              | APC           | F   | FAP                | Yes                   | Yes                                    | FAP                        | Severe (>1000) | Adenomas                                         | 23                         | CRC (23)                      | No                            | duodenal papilla adenocarcinoma (32)                    | Fundic Gland Polyps (32)                                |
| 183     | HEC         | Patient              | APC           | M   | FAP                | Yes                   | Yes                                    | FAP                        | Severe (>1000) | Adenomas                                         | 12                         | No                            | No                            | No                                                      | No                                                      |
| 185     | HEC         | Relative to case 170 | APC           | NA  | FAP                | Yes                   | Yes                                    | FAP                        | Severe (>1000) | Adenomas                                         | No                         | No                            | No                            | No                                                      | No                                                      |
| 186     | HEC         | Relative to case 170 | APC           | NA  | FAP                | Yes                   | Yes                                    | FAP                        | Severe (>1000) | Adenomas                                         | No                         | No                            | No                            | No                                                      | No                                                      |
| 187     | HEC         | Relative to case 174 | APC           | NA  | FAP                | Yes                   | Yes                                    | FAP                        | Severe (>1000) | Adenomas                                         | No                         | No                            | No                            | No                                                      | No                                                      |
| 188     | HEC         | Relative to case 174 | APC           | NA  | FAP                | Yes                   | Yes                                    | FAP                        | Severe (>1000) | Adenomas                                         | No                         | No                            | No                            | No                                                      | No                                                      |
| 048     | HGBU        | Patient              | BMPR1A        | M   | FAP                | No                    | No                                     | FAP                        | Severe (>1000) | Adenomas                                         | 25                         | No                            | No                            | No                                                      | No                                                      |
| 109     | HIBA        | Patient              | BMPR1A        | F   | FAP                | No                    | No                                     | FAP                        | Severe (>1000) | Adenomas                                         | 48                         | CRC (48)                      | No                            | No                                                      | No                                                      |
| 001     | HGBU        | Patient              | BRCA1         | M   | FAP                | No                    | No                                     | FAP                        | Severe (>1000) | Adenomas                                         | 42                         | No                            | No                            | No                                                      | No                                                      |
| 049     | HGBU        | Patient              | ERCC2         | F   | FAP                | No                    | Father Kidney                          | AFAP                       | 30             | Adenomas                                         | 52                         | No                            | No                            | No                                                      | No                                                      |
| 003     | HGBU        | Patient              | FANCM         | M   | FAP                | No                    | Grandfather CRC                        | AFAP                       | 20             | Adenoma                                          | 58                         | CRC (58)                      | No                            | No                                                      | No                                                      |
| 029     | HGBU        | Patient              | FLCN          | M   | FAP                | No                    | No                                     | AFAP                       | <100           | Adenomas                                         | 64                         | No                            | No                            | No                                                      | No                                                      |
| 110     | HIBA        | Patient              | MSH3          | F   | FAP                | Yes                   | Yes                                    | FAP                        | Severe (>1000) | Adenomas                                         | 42                         | No                            | No                            | No                                                      | No                                                      |
| 048     | HGBU        | Patient              | MSHC          | M   | FAP                | No                    | Uncle Pancreas, Aunt: Ovary, Breast    | AFAP                       | 20             | Adenomas                                         | 57                         | CRC (57)                      | No                            | No                                                      | No                                                      |
| 017     | HGBU        | Patient              | MUTYH         | F   | FAP                | No                    | No                                     | FAP                        | >100           | FAP                                              | 43                         | CRC (43)                      | No                            | Thyroid Nodule (43)                                     | No                                                      |
| 024     | HGBU        | Patient              | MUTYH         | F   | FAP                | No                    | No                                     | FAP                        | >100           | FAP                                              | 37                         | CRC (37)                      | No                            | No                                                      | No                                                      |
| 078     | HIBA        | Patient              | MUTYH         | M   | FAP                | Yes                   | No                                     | FAP                        | >100           | Adenomas                                         | 37                         | CRC (72)                      | No                            | No                                                      | No                                                      |
| 105     | HIBA        | Patient              | MUTYH         | M   | FAP                | Yes                   | Yes                                    | FAP                        | >100           | Adenomas                                         | 50                         | No                            | No                            | No                                                      | No                                                      |
| 106     | HIBA        | Patient              | MUTYH         | F   | FAP                | No                    | No                                     | FAP                        | >100           | Adenomas                                         | 37                         | CRC (63)                      | No                            | No                                                      | No                                                      |
| 107     | HIBA        | Patient              | MUTYH         | M   | FAP                | No                    | No                                     | FAP                        | >100           | Adenomas                                         | 37                         | CRC (47)                      | No                            | No                                                      | No                                                      |
| 108     | HIBA        | Patient              | MUTYH         | M   | FAP                | Yes                   | Yes                                    | FAP                        | >100           | Adenomas                                         | 57                         | No                            | No                            | No                                                      | No                                                      |
| 111     | HIBA        | Relative to case 105 | MUTYH         | F   | FAP                | No                    | No                                     | FAP                        | >100           | Adenomas                                         | No                         | No                            | No                            | No                                                      | No                                                      |
| 112     | HIBA        | Relative to case 106 | MUTYH         | F   | FAP                | Yes                   | Yes                                    | FAP                        | >100           | Adenomas                                         | 38                         | No                            | No                            | No                                                      | No                                                      |
| 114     | HIBA        | Patient              | MUTYH         | F   | FAP                | Yes                   | Yes                                    | FAP                        | >100           | Adenomas                                         | 45                         | No                            | No                            | No                                                      | No                                                      |
| 046     | HGBU        | Patient              | NEIL1         | M   | FAP                | No                    | Yes (Father CRC)                       | AFAP / Mixed               | >100           | Serrated Adenomas                                | 60                         | CRC (60)                      | No                            | No                                                      | No                                                      |
| 006     | HGBU        | Patient              | SMAD4         | F   | FAP                | No                    | No                                     | AFAP                       | 20             | Mixed                                            | 60                         | No                            | No                            | Gastric Polyps                                          | No                                                      |
| 027     | HGBU        | Patient              | SMAD4         | M   | FAP                | No                    | Yes                                    | AFAP                       | <100           | Juvenile                                         | 18                         | No                            | No                            | No                                                      | No                                                      |
| 007     | HGBU        | Patient              |               | M   | FAP                | Yes                   | Father CRC                             | FAP                        | Severe (>1000) | FAP                                              | 26                         | No                            | No                            | No                                                      | No                                                      |

|     |      |         |     |     |     |                                              |            |                |                       |    |             |                              |                              |
|-----|------|---------|-----|-----|-----|----------------------------------------------|------------|----------------|-----------------------|----|-------------|------------------------------|------------------------------|
| 008 | HGBU | Patient | F   | FAP | No  | No                                           | FAP        | >100           | Adenomas              | 55 | CRC (55)    | Thyroid Nodule               |                              |
| 009 | HGBU | Patient | M   | FAP | Yes | No                                           | AFAP       | <100           | Adenomas              | 51 | CRC         | Osteoma                      | Thyroid Nodules              |
| 015 | HGBU | Patient | F   | FAP | Yes | Yes                                          | FAP        | >100           | FAP                   | 10 | No          | Duodenal Adenomas            |                              |
| 018 | HGBU | Patient | M   | FAP | No  | Father Prostate                              | FAP        | Severe (>1000) | FAP                   | 65 | No          | No                           |                              |
| 021 | HGBU | Patient | F   | FAP | No  | No                                           | FAP        | <100           | Adenomas              | 27 | No          | No                           |                              |
| 022 | HGBU | Patient | M   | FAP | Yes | Yes                                          | FAP        | Severe (>1000) | FAP                   | 26 | No          | SWANOMA (39)                 |                              |
| 025 | HGBU | Patient | F   | FAP | Yes | Brother CRC                                  | AFAP       | 20             | Mixed                 | 18 | No          | Juvenile Gastric Polyps (45) | HYPERTHROIDISM (47)          |
| 026 | HGBU | Patient | M   | FAP | Yes | Yes                                          | FAP        | Severe (>1000) | FAP                   | 20 | CRC (20)    | Duodenal Polyps              |                              |
| 028 | HGBU | Patient | F   | FAP | Yes | Uncle CRC / GrandMother Uterus / Mother Lung | FAP        | Severe (>1000) | FAP                   | 31 | No          | No                           |                              |
| 036 | HGBU | Patient | M   | FAP | Yes | Mother CRC                                   | FAP        | Severe (>1000) | FAP                   | 30 | CRC (30)    | No                           |                              |
| 037 | HGBU | Patient | F   | FAP | Yes | Mother, Sister, Brother: CRC                 | FAP        | Severe (>1000) | FAP                   | 18 | No          | No                           |                              |
| 038 | HGBU | Patient | APC | F   | FAP | Uncle Father Side ?                          | FAP        | Severe (>1000) | FAP                   | 25 | No          | Gastric Polyps               |                              |
| 039 | HGBU | Patient | APC | F   | FAP | Brother, Mother, Aunt: CRC                   | FAP        | Severe (>1000) | FAP                   | 10 | CRC (46)    | Gastric Duodenal Polyps (20) |                              |
| 041 | HGBU | Patient | M   | FAP | No  | Father, GrandFather: CRC                     | FAP        | Severe (>1000) | FAP                   | 25 | CRC (25)    | No                           |                              |
| 044 | HGBU | Patient | F   | FAP | No  | Father CRC                                   | FAP        | Severe (>1000) | Adenomas              | 45 | CRC (45)    | Gastric Duodenal Polyps (45) |                              |
| 051 | HGBU | Patient | F   | FAP | Yes | Father, ?                                    | FAP        | Severe (>1000) | Adenomas              | 16 | No          | Gastric Polyps (16)          |                              |
| 054 | HGBU | Patient | M   | FAP | Yes | Brother CRC                                  | FAP        | Severe (>1000) | Adenomas              | 28 | No          | Gastric Polyps (28)          |                              |
| 056 | HGBU | Patient | M   | FAP | Yes | No                                           | FAP        | Severe (>1000) | Adenomas              | 40 | No          | No                           |                              |
| 059 | HGBU | Patient | APC | F   | FAP | Mother CRC?                                  | FAP        | Severe (>1000) | Adenomas              | 22 | No          | No                           |                              |
| 061 | HGBU | Patient | M   | FAP | Yes | Yes                                          | FAP        | Severe (>1000) | Adenomas              | 24 | No          | No                           |                              |
| 062 | HGBU | Patient | M   | FAP | No  | Mother CRC                                   | FAP        | Severe (>1000) | Adenomas              | 48 | CRC (48)    | No                           |                              |
| 063 | HGBU | Patient | M   | FAP | Yes | No                                           | FAP        | Severe (>1000) | Adenomas              | 32 | No          | Desmoid Tumor                | Polyps: Gastric and Duodenum |
| 064 | HGBU | Patient | M   | FAP | Yes | Yes                                          | FAP        | Severe (>1000) | Adenomas              | 62 | CRC (62)    | Gastric Polyps               |                              |
| 065 | HGBU | Patient | F   | FAP | No  | No                                           | AFAP       | Severe (>1000) | Adenomas              | 78 | CRC (78)    | No                           |                              |
| 066 | HGBU | Patient | F   | FAP | Yes | Yes                                          | FAP        | Severe (>1000) | Adenomas              | 15 | No          | Desmoid Tumor (26)           | Polyps Duodenum (22)         |
| 067 | HGBU | Patient | APC | M   | FAP | Yes                                          | FAP        | Severe (>1000) | Adenomas              | 38 | CRC (38)    | Ostoma (35)                  | Gastric Polyps (38)          |
| 068 | HGBU | Patient | M   | FAP | Yes | CRC                                          | FAP        | Severe (>1000) | Adenomas              | 21 | No          | Ostoma (8)                   |                              |
| 070 | HGBU | Patient | F   | FAP | No  | Aunt - Grandfather CRC                       | FAP        | Severe (>1000) | Adenomas              | 36 | No          | Desmoid Tumor (36)           | Polyps Duodenum (36)         |
| 072 | HGBU | Patient | NA  | FAP | Yes | Yes                                          | FAP        | Severe (>1000) | Adenomas              | 27 | No          | No                           |                              |
| 073 | HGBU | Patient | NA  | FAP | Yes | Yes                                          | FAP        | Severe (>1000) | Adenomas              | No | No          | No                           |                              |
| 074 | HGBU | Patient | NA  | FAP | Yes | Yes                                          | FAP        | Severe (>1000) | Adenomas              | No | No          | No                           |                              |
| 076 | HGBU | Patient | NA  | FAP | Yes | Yes                                          | FAP        | Severe (>1000) | Adenomas              | No | No          | No                           |                              |
| 116 | HIBA | Patient | M   | FAP | Yes | Yes                                          | FAP        | Severe (>1000) | Adenomas              | 59 | No          | No                           |                              |
| 117 | HIBA | Patient | M   | FAP | Yes | Yes                                          | FAP        | Severe (>1000) | Adenomas              | 54 | No          | No                           |                              |
| 172 | HEC  | Patient | NA  | FAP | Yes | Yes                                          | FAP        | Severe (>1000) | Adenomas              | No | No          | No                           |                              |
| 175 | HEC  | Patient | NA  | FAP | Yes | Yes                                          | FAP        | Severe (>1000) | Adenomas              | No | No          | No                           |                              |
| 176 | HEC  | Patient | NA  | FAP | Yes | Yes                                          | FAP        | Severe (>1000) | Adenomas              | No | No          | No                           |                              |
| 177 | HEC  | Patient | NA  | FAP | Yes | Yes                                          | FAP        | Severe (>1000) | Adenomas              | No | No          | No                           |                              |
| 178 | HEC  | Patient | NA  | FAP | Yes | Yes                                          | FAP        | Severe (>1000) | Adenomas              | No | No          | No                           |                              |
| 146 | HEC  | Patient | NA  | FAP | Yes | Yes                                          | NA         | FAP            | Adenomas              | No | No          | No                           |                              |
| 151 | HEC  | Patient | NA  | FAP | Yes | Yes                                          | NA         | FAP            | Adenomas              | No | No          | No                           |                              |
| 152 | HEC  | Patient | NA  | FAP | Yes | Yes                                          | NA         | FAP            | Adenomas              | No | No          | No                           |                              |
| 153 | HEC  | Patient | NA  | FAP | Yes | Yes                                          | NA         | FAP            | Adenomas              | No | No          | No                           |                              |
| 127 | HIBA | Patient | M   | FAP | No  | No                                           | AFAP       | <100           | Adenomas              | 64 | No          | No                           |                              |
| 128 | HIBA | Patient | M   | FAP | Yes | Yes                                          | FAP        | Severe (>1000) | Adenomas              | 18 | No          | No                           |                              |
| 129 | HIBA | Patient | F   | FAP | No  | Yes                                          | FAP        | Severe (>1000) | Adenomas              | 25 | No          | Gastric Polyps               |                              |
| 130 | HIBA | Patient | M   | FAP | No  | No                                           | AFAP       | 20             | Adenomas              | 56 | No          | No                           |                              |
| 131 | HIBA | Patient | F   | FAP | Yes | Yes                                          | FAP        | Severe (>1000) | Adenomas              | 17 | No          | Gastric Polyps               |                              |
| 132 | HIBA | Patient | M   | FAP | No  | No                                           | AFAP       | 30             | Adenomas              | 52 | No          | No                           |                              |
| 133 | HIBA | Patient | F   | FAP | Yes | Yes                                          | FAP        | Severe (>1000) | Adenomas              | 15 | No          | No                           |                              |
| 134 | HIBA | Patient | M   | FAP | Yes | Yes                                          | FAP        | Severe (>1000) | Adenomas              | 33 | No          | No                           |                              |
| 135 | HIBA | Patient | M   | FAP | Yes | No                                           | AFAP/Mixed | <100           | Hiperplastic Adenomas | 33 | No          | No                           |                              |
| 136 | HIBA | Patient | F   | FAP | Yes | Yes                                          | FAP        | Severe (>1000) | Adenomas              | 45 | CRC (47)    | Gastric Polyps (45)          |                              |
| 137 | HIBA | Patient | M   | FAP | No  | Yes                                          | FAP        | Severe (>1000) | Adenomas              | 48 | Rectum (48) | No                           |                              |
| 138 | HIBA | Patient | M   | FAP | Yes | No                                           | FAP        | Severe (>1000) | Adenomas              | 32 | No          | No                           |                              |
| 140 | HIBA | Patient | M   | FAP | Yes | Yes                                          | FAP        | Severe (>1000) | Adenomas              | 62 | CRC (62)    | No                           |                              |
| 141 | HIBA | Patient | M   | FAP | No  | No                                           | AFAP       | <100           | Adenomas              | 78 | CRC (78)    | No                           |                              |
| 142 | HIBA | Patient | F   | FAP | Yes | Yes                                          | FAP        | Severe (>1000) | Adenomas              | 15 | No          | No                           |                              |
| 143 | HIBA | Patient | F   | FAP | Yes | Yes                                          | FAP        | Severe (>1000) | Adenomas              | 38 | CRC (38)    | No                           |                              |
| 144 | HIBA | Patient | M   | FAP | Yes | Yes                                          | FAP        | Severe (>1000) | Adenomas              | 38 | CRC (38)    | No                           |                              |
| 145 | HIBA | Patient | F   | FAP | Yes | Yes                                          | AFAP       | >100           | Adenomas              | 24 | No          | No                           |                              |
| 118 | HIBA | Patient | M   | FAP | Yes | Yes                                          | FAP        | Severe (>1000) | Adenomas              | 50 | CRC (50)    | No                           |                              |
| 119 | HIBA | Patient | F   | FAP | Yes | Yes                                          | FAP        | Severe (>1000) | Adenomas              | 57 | CRC (57)    | No                           |                              |
| 120 | HIBA | Patient | F   | FAP | Yes | Yes                                          | FAP        | Severe (>1000) | Adenomas              | 54 | CRC (54)    | No                           |                              |
| 121 | HIBA | Patient | M   | FAP | Yes | Yes                                          | AFAP       | <100           | Adenomas              | 72 | No          | No                           |                              |
| 122 | HIBA | Patient | M   | FAP | Yes | Yes                                          | FAP        | >100           | Adenomas              | 62 | CRC (62)    | No                           |                              |
| 123 | HIBA | Patient | M   | FAP | Yes | Yes                                          | FAP        | Severe (>1000) | Adenomas              | 50 | CRC (50)    | No                           |                              |
| 124 | HIBA | Patient | M   | FAP | Yes | Yes                                          | FAP        | Severe (>1000) | Adenomas              | 31 | CRC (31)    | No                           |                              |
| 125 | HIBA | Patient | F   | FAP | Yes | Yes                                          | FAP        | Severe (>1000) | Adenomas              | 42 | CRC (42)    | No                           |                              |
| 189 | HIBA | Patient | M   | FAP | No  | Yes                                          | AFAP       | <50            | Adenomas              | 58 | CRC (58)    | Thyroid Cancer (19)          |                              |
| 190 | HIBA | Patient | M   | FAP | Yes | Yes                                          | FAP        | Severe (>1000) | Adenomas              | 26 | No          | No                           |                              |
| 191 | HIBA | Patient | F   | FAP | No  | No                                           | FAP        | Severe (>1000) | Adenomas              | 55 | Yes (55)    | Rectum (55)                  | Thyroid Nodule               |
| 192 | HIBA | Patient | M   | FAP | Yes | No                                           | AFAP       | <100           | Adenomas              | 51 | CRC (51)    | Osteoma                      | Thyroid Nodule               |
| 193 | HIBA | Patient | F   | FAP | Yes | Yes                                          | FAP        | Severe (>1000) | Adenomas              | 10 | No          | Duodenal Adenoma             |                              |
| 194 | HIBA | Patient | F   | FAP | No  | No                                           | FAP        | Severe (>1000) | Adenomas              | 27 | No          | No                           |                              |
| 195 | HIBA | Patient | M   | FAP | Yes | Yes                                          | FAP        | Severe (>1000) | Adenomas              | 26 | No          | Swanoma (39)                 |                              |
| 196 | HIBA | Patient | F   | FAP | Yes | Yes                                          | AFAP       | <50            | Mixed                 | 18 | No          | Gastric Polyps               | Hyperthyroidism              |
| 197 | HIBA | Patient | M   | FAP | Yes | Yes                                          | FAP        | Severe (>1000) | Adenomas              | 20 | CRC (20)    | Duodenal Polyps              |                              |
| 198 | HIBA | Patient | F   | FAP | Yes | Yes                                          | FAP        | Severe (>1000) | Adenomas              | 31 | No          | No                           |                              |
| 199 | HIBA | Patient | M   | FAP | No  | No                                           | AFAP       | <100           | Adenomas              | 64 | No          | No                           |                              |
| 200 | HIBA | Patient | M   | FAP | Yes | Yes                                          | FAP        | Severe (>1000) | Adenomas              | 18 | No          | No                           |                              |
| 201 | HIBA | Patient | F   | FAP | No  | Yes                                          | FAP        | Severe (>1000) | Adenomas              | 25 | No          | Gastric Polyps               |                              |
| 202 | HIBA | Patient | M   | FAP | No  | Yes                                          | AFAP       | <100           | Adenomas              | 56 | No          | No                           |                              |
| 203 | HGBU | Patient | F   | FAP | Yes | Yes                                          | FAP        | Severe (>1000) | Adenomas              | 17 | No          | Gastric Polyps               |                              |

(1) HGBU Hospital de Gastroenterología "Dr. Bonorino Udaondo", CABA, Argentina  
HIBA Hospital Italiano de Buenos Aires, CABA, Argentina  
HEC Hospital El Cruce (Florencio Varela, Buenos Aires, Argentina)

Supplementary Table 52

| Case    |                      | Gene     | Gemline Identified Variant |     |            |                |                          |              |            |                   |               |          | Variant is NOVEL          |                                         | ClinVar                                                   |              |                                                                        |
|---------|----------------------|----------|----------------------------|-----|------------|----------------|--------------------------|--------------|------------|-------------------|---------------|----------|---------------------------|-----------------------------------------|-----------------------------------------------------------|--------------|------------------------------------------------------------------------|
| Case ID | Classification       | Affected | Transcript                 | Chr | Position   | HGVSc.         | HGVSp.                   | Ref Allele   | Alt Allele | Variant Type      | Coding Impact | Zygosity | (Not Reported in ClinVar) | Variation ID                            | Preferred Name                                            | Report Count | Significance                                                           |
| 005     | Index Patient        | APC      | NM_000038.6                | 5   | 11283962   | c.4098_4111del | p.Gln327Serfs*3          | TGACACACAAAA | A          | Deletion          | frameshift    | Het      | NOVEL (True)              |                                         |                                                           |              |                                                                        |
| 010     | Index Patient        | APC      | NM_000038.6                | 5   | 11281904   | c.1271dup      | p.Glu245Glyfs*4          | G            | A          | Insertion         | frameshift    | Het      | NOVEL (True)              |                                         |                                                           |              |                                                                        |
| 014     | Index Patient        | APC      | NM_000038.6                | 5   | 112838043  | c.2450del      | p.Gly817Alafs*3          | G            | T          | Deletion          | frameshift    | Het      | NOVEL (True)              |                                         |                                                           |              |                                                                        |
| 033     | Index Patient        | APC      | NM_000038.6                | 5   | 11283953   | c.4356del      | p.Asn445Ilefs*18         | T            | T          | Deletion          | frameshift    | Het      | NOVEL (True)              |                                         |                                                           |              |                                                                        |
| 077     | Relative to case 033 | APC      | NM_000038.6                | 5   | 11283953   | c.4356del      | p.Asn445Ilefs*18         | T            | T          | Deletion          | frameshift    | Het      | NOVEL (True)              |                                         |                                                           |              |                                                                        |
| 075     | Index Patient        | APC      | NM_000038.6                | 5   | 11283546   | c.2952dup      | Ser583Ilefs*4            | A            | A          | Insertion         | frameshift    | Het      | NOVEL (True)              |                                         |                                                           |              |                                                                        |
| 088     | Index Patient        | APC      | NM_000038.6                | 5   | 11283814   | c.2520dup      | p.Ser1395Lysfs*3         | C            | A          | Insertion         | frameshift    | Het      | NOVEL (True)              |                                         |                                                           |              |                                                                        |
| 023     | Index Patient        | APC      | NM_000038.6                | 5   | 11283978   | c.4183dup      | p.Ser1395Lysfs*3         | A            | A          | Insertion         | frameshift    | Het      | NOVEL (True)              |                                         |                                                           |              |                                                                        |
| 174     | Index Patient        | APC      | NM_000038.6                | 5   | 11283978   | c.4183dup      | p.Ser1395Lysfs*3         | A            | A          | Insertion         | frameshift    | Het      | NOVEL (True)              |                                         |                                                           |              |                                                                        |
| 185     | Relative to case 170 | APC      | NM_000038.6                | 5   | 11283978   | c.4183dup      | p.Ser1395Lysfs*3         | C            | A          | Insertion         | frameshift    | Het      | NOVEL (True)              |                                         |                                                           |              |                                                                        |
| 186     | Relative to case 170 | APC      | NM_000038.6                | 5   | 11283978   | c.4183dup      | p.Ser1395Lysfs*3         | C            | A          | Insertion         | frameshift    | Het      | NOVEL (True)              |                                         |                                                           |              |                                                                        |
| 187     | Relative to case 174 | APC      | NM_000038.6                | 5   | 11283978   | c.4183dup      | p.Ser1395Lysfs*3         | C            | A          | Insertion         | frameshift    | Het      | NOVEL (True)              |                                         |                                                           |              |                                                                        |
| 188     | Relative to case 174 | APC      | NM_000038.6                | 5   | 11283978   | c.4183dup      | p.Ser1395Lysfs*3         | C            | A          | Insertion         | frameshift    | Het      | NOVEL (True)              |                                         |                                                           |              |                                                                        |
| 019     | Index Patient        | ERCC4    | NM_005236.6                | 16  | 13939090   | c.1795G>A      | p.A298G                  | G            | A          | SNV               | missense      | Het      | True                      |                                         |                                                           |              |                                                                        |
| 046     | Index Patient        | NELL1    | NM_001256552.1             | 15  | 75349153   | c.506G>A       | p.Gly169Asp              | G            | A          | SNV               | missense      | Het      | True                      |                                         |                                                           |              |                                                                        |
| 002     | Index Patient        | APC      | NM_000038.6                | 5   | 11283937   | c.3803dup      | p.Ile1269Aunfs*7         | C            | A          | Insertion         | frameshift    | Het      | False                     | 2682626                                 | NM_000038.6(APC):c.3803dup (p.Ile1269A)                   | 2            | Pathogenic                                                             |
| 011     | Index Patient        | APC      | NM_000038.6                | 5   | 11283991   | c.3758dup      | p.Glu1257Argfs*19        | C            | A          | Insertion         | frameshift    | Het      | False                     | 2126315                                 | NM_000038.6(APC):c.3758dup (p.Glu1257A)                   | 2            | Pathogenic                                                             |
| 003     | Index Patient        | APC      | NM_000038.6                | 5   | 112837913  | c.2319del      | p.Phe773Leufs*4          | T            | A          | Deletion          | frameshift    | Het      | False                     | 1073520                                 | NM_000038.6(APC):c.2319del (p.Phe773L)                    | 2            | Pathogenic                                                             |
| 016     | Index Patient        | APC      | NM_000038.6                | 5   | 11283839   | c.2805C>A      | p.Tyr935*                | C            | A          | SNV               | nonsense      | Het      | False                     | 810                                     | NM_000038.6(APC):c.2805C>A (p.Tyr935T)                    | 20           | Pathogenic                                                             |
| 020     | Index Patient        | APC      | NM_000038.6                | 5   | 11283894   | c.2802_2805del | p.Tyr935Ilefs*19         | ACTT         | TT         | Deletion          | frameshift    | Het      | False                     | 42956                                   | NM_000038.6(APC):c.2802_2805del (p.Tyr935I)               | 6            | Pathogenic                                                             |
| 030     | Index Patient        | APC      | NM_000038.6                | 5   | 11283915   | c.3927_3931del | p.Glu1309Aspfs*4         | AAAGA        | GA         | Deletion          | frameshift    | Het      | False                     | 816                                     | NM_000038.6(APC):c.3927_3931del (p.Glu1309A)              | 44           | Pathogenic                                                             |
| 031     | Index Patient        | APC      | NM_000038.6                | 5   | 11283915   | c.3927_3931del | p.Glu1309Aspfs*4         | AAAGA        | GA         | Deletion          | frameshift    | Het      | False                     | 1482312                                 | NM_000038.6(APC):c.2016_2017del (p.H6672fs)               | 4            | Pathogenic                                                             |
| 032     | Index Patient        | APC      | NM_000038.6                | 5   | 11280312   | c.763dup       | p.H625Pprofs*2           | AT           | AG         | Insertion         | frameshift    | Het      | False                     | 3213188                                 | NM_000038.6(APC):c.763dup (p.H625Pfs)                     | 1            | Pathogenic                                                             |
| 034     | Index Patient        | APC      | NM_000038.6                | 5   | 11284026   | c.612_401del   | p.C412_401del            | C            | A          | Deletion          | frameshift    | Het      | False                     | 823                                     | NM_000038.6(APC):c.465_463del (p.Glu1538fs)               | 10           | Pathogenic                                                             |
| 035     | Index Patient        | APC      | NM_000038.6                | 5   | 11275711   | c.509_512del   | p.Asp170Valfs*4          | ATAG         | ATAG       | Deletion          | frameshift    | Het      | False                     | 804                                     | NM_000038.6(APC):c.509_512del (p.Asp170fs)                | 14           | Pathogenic                                                             |
| 038     | Index Patient        | APC      | NM_000038.6                | 5   | 11283915   | c.3927_3931del | p.Glu1309Aspfs*4         | AAAGA        | GA         | Deletion          | frameshift    | Het      | False                     | 816                                     | NM_000038.6(APC):c.3927_3931del (p.Glu1309A)              | 44           | Pathogenic                                                             |
| 039     | Index Patient        | APC      | NM_000038.6                | 5   | 11283915   | c.3927_3931del | p.Glu1309Aspfs*4         | AAAGA        | GA         | Deletion          | frameshift    | Het      | False                     | 816                                     | NM_000038.6(APC):c.3927_3931del (p.Glu1309A)              | 44           | Pathogenic                                                             |
| 040     | Index Patient        | APC      | NM_000038.6                | 5   | 11283915   | c.3927_3931del | p.Glu1309Aspfs*4         | AAAGA        | GA         | Deletion          | frameshift    | Het      | False                     | 127281                                  | NM_000038.6(APC):c.3412C>T (p.Arg805Ter)                  | 14           | Pathogenic                                                             |
| 042     | Index Patient        | APC      | NM_000038.6                | 5   | 11283914   | c.3920T>A      | p.Ile1307Lys             | T            | A          | SNV               | missense      | Het      | False                     | 822                                     | NM_000038.6(APC):c.3920T>A (p.Ile1307Lys)                 | 53           | Conflicting classifications of pathogenicity; association; risk factor |
| 045     | Index Patient        | APC      | NM_000038.6                | 5   | 11283839   | c.2795C>G      | p.Ser932*                | C            | G          | SNV               | nonsense      | Het      | False                     | 236581                                  | NM_000038.6(APC):c.2795C>G (p.Ser932Ter)                  | 2            | Pathogenic                                                             |
| 047     | Index Patient        | APC      | NM_000038.6                | 5   | 11283874   | c.3183_3187del | p.Gln1062_Ser1063delins* | AAAAC        | AAAC       | Deletion          | nonsense      | Het      | False                     | 88913                                   | NM_000038.6(APC):c.3183_3187del (p.Gln1062_Ser1063delins) | 31           | Pathogenic                                                             |
| 050     | Index Patient        | APC      | NM_000038.6                | 5   | 11283977   | c.3202C>G      | p.Ser968*                | C            | G          | SNV               | missense      | Het      | False                     | 490258                                  | NM_000038.6(APC):c.3202C>G (p.Ser968Ter)                  | 2            | Pathogenic                                                             |
| 052     | Index Patient        | APC      | NM_000038.6                | 5   | 11283911   | c.3920_3924del | p.Ile1307Argfs*6         | AAATA        | T          | SNV               | frameshift    | Het      | False                     | 419999                                  | NM_000038.6(APC):c.3920_3924del (p.Ile1307fs)             | 2            | Pathogenic                                                             |
| 055     | Index Patient        | APC      | NM_000038.6                | 5   | 112840023  | c.4429C>T      | p.C4429C>T               | C            | T          | SNV               | nonsense      | Het      | False                     | 2584019                                 | NM_000038.6(APC):c.4429C>T (p.C4429T)                     | 1            | Pathogenic                                                             |
| 057     | Index Patient        | APC      | NM_000038.6                | 5   | 11283937   | c.3783_3784del | p.Tyr1261Leufs*13        | TT           | TT         | Deletion          | frameshift    | Het      | False                     | 537503                                  | NM_000038.6(APC):c.3783_3784del (p.Tyr1261fs)             | 10           | Pathogenic                                                             |
| 058     | Index Patient        | APC      | NM_000038.6                | 5   | 11283789   | c.2396_2397del | p.Tyr799Cysfs*3          | TA           | TA         | Deletion          | frameshift    | Het      | False                     | 2502365                                 | NM_000038.6(APC):c.2396_2397del (p.Tyr799fs)              | 3            | Pathogenic/Likely pathogenic                                           |
| 059     | Index Patient        | APC      | NM_000038.6                | 5   | 11283915   | c.3927_3931del | p.Glu1309Aspfs*4         | AAAGA        | GA         | Deletion          | frameshift    | Het      | False                     | 816                                     | NM_000038.6(APC):c.3927_3931del (p.Glu1309A)              | 44           | Pathogenic                                                             |
| 067     | Index Patient        | APC      | NM_000038.6                | 5   | 11283915   | c.3927_3931del | p.Glu1309Aspfs*4         | AAAGA        | GA         | Deletion          | frameshift    | Het      | False                     | 816                                     | NM_000038.6(APC):c.3927_3931del (p.Glu1309A)              | 44           | Pathogenic                                                             |
| 069     | Index Patient        | APC      | NM_000038.6                | 5   | 11283915   | c.3927_3931del | p.Glu1309Aspfs*4         | AAAGA        | GA         | Deletion          | frameshift    | Het      | False                     | 816                                     | NM_000038.6(APC):c.3927_3931del (p.Glu1309A)              | 44           | Pathogenic                                                             |
| 071     | Index Patient        | APC      | NM_000038.6                | 5   | 11283829   | c.3336_3340del | p.Asn113Serfs*4          | CAAT         | A          | Deletion          | frameshift    | Het      | False                     | 826233                                  | NM_000038.6(APC):c.3336_3340del (p.Asn113fs)              | 3            | Pathogenic                                                             |
| 079     | Index Patient        | APC      | NM_000038.6                | 5   | 11283877   | c.3193C>A      | p.Gln1065Lys             | C            | A          | SNV               | nonsense      | Het      | False                     | 469914                                  | NM_000038.6(APC):c.3193C>A (p.Gln1065Lys)                 | 6            | Uncertain significance                                                 |
| 080     | Index Patient        | APC      | NM_000038.6                | 5   | 11283859   | c.2959C>G      | p.Gln1069Ser             | G            | G          | SNV               | nonsense      | Het      | False                     | 584668                                  | NM_000038.6(APC):c.2959C>G (p.Gln1069Ser)                 | 4            | Uncertain significance                                                 |
| 081     | Index Patient        | APC      | NM_000038.6                | 5   | 11283837   | c.2805A>G      | p.Tyr935*                | C            | G          | SNV               | nonsense      | Het      | False                     | 93344                                   | NM_000038.6(APC):c.2805A>G (p.Tyr935Ter)                  | 4            | Pathogenic                                                             |
| 082     | Index Patient        | APC      | NM_000038.6                | 5   | 11283914   | c.3920T>A      | p.Ile1307Lys             | T            | A          | SNV               | missense      | Het      | False                     | 822                                     | NM_000038.6(APC):c.3920T>A (p.Ile1307Lys)                 | 53           | Conflicting classifications of pathogenicity; association; risk factor |
| 083     | Index Patient        | APC      | NM_000038.6                | 5   | 11284375   | c.814G>A       | p.Arg274His              | G            | A          | SNV               | missense      | Het      | False                     | 414178                                  | NM_000038.6(APC):c.814G>A (p.Arg274His)                   | 11           | Conflicting classifications of pathogenicity                           |
| 084     | Index Patient        | APC      | NM_000038.6                | 5   | 11283949   | c.174A_2A>G    | p.S174A_2A>G             | A            | G          | Splicing Deletion | frameshift    | Het      | False                     | 155482                                  | NM_000038.6(APC):c.174A_2A>G (p.S174A_2A>G)               | 9            | Pathogenic                                                             |
| 085     | Index Patient        | APC      | NM_000038.6                | 5   | 11283815   | c.2522del      | p.Leu841*                | L            | SNV        | nonsense          | Het           | False    | 642670                    | NM_000038.6(APC):c.2522del (p.Leu841fs) | 1                                                         | Pathogenic   |                                                                        |
| 086     | Index Patient        | APC      | NM_000038.6                | 5   | 11283792   | c.2333G>A      | p.Asn778Ser              | A            | G          | SNV               | nonsense      | Het      | False                     | 630116                                  | NM_000038.6(APC):c.2333G>A (p.Asn778Ser)                  | 3            | Uncertain significance                                                 |
| 087     | Index Patient        | APC      | NM_000038.6                | 5   | 11284010   | c.4508C>A      | p.Ser1503*               | C            | A          | SNV               | nonsense      | Het      | False                     | 2584283                                 | NM_000038.6(APC):c.4508C>A (p.Ser1503Ter)                 | 1            | Pathogenic                                                             |
| 089     | Index Patient        | APC      | NM_000038.6                | 5   | 11283839   | c.2805C>A      | p.Tyr935*                | C            | A          | SNV               | nonsense      | Het      | False                     | 810                                     | NM_000038.6(APC):c.2805C>A (p.Tyr935Ter)                  | 20           | Pathogenic                                                             |
| 090     | Index Patient        | APC      | NM_000038.6                | 5   | 11283955   | c.4361A>T      | p.Lys1454Ile             | A            | T          | SNV               | nonsense      | Het      | False                     | 630564                                  | NM_000038.6(APC):c.4361A>T (p.Lys1454Ile)                 | 2            | Uncertain significance                                                 |
| 091     | Index Patient        | APC      | NM_000038.6                | 5   | 11283874   | c.3183_3187del | p.Gln1062_Ser1063delins* | AAAAC        | AAAC       | Deletion          | nonsense      | Het      | False                     | 88913                                   | NM_000038.6(APC):c.3183_3187del (p.Gln1062_Ser1063delins) | 31           | Pathogenic                                                             |
| 092     | Index Patient        | APC      | NM_000038.6                | 5   | 11283922   | c.4128T>A      | p.Tyr1376*               | T            | A          | SNV               | nonsense      | Het      | False                     | 178059                                  | NM_000038.6(APC):c.4128T>A (p.Tyr1376Ter)                 | 1            | Pathogenic                                                             |
| 093     | Index Patient        | APC      | NM_000038.6                | 5   | 11283915   | c.3927_3931del | p.Glu1309Aspfs*4         | AAAG         | GA         | Deletion          | frameshift    | Het      | False                     | 816                                     | NM_000038.6(APC):c.3927_3931del (p.Glu1309A)              | 44           | Pathogenic                                                             |
| 094     | Index Patient        | APC      | NM_000038.6                | 5   | 11283926   | c.3940C>T      | p.Arg324*                | C            | T          | SNV               | nonsense      | Het      | False                     | 184937                                  | NM_000038.6(APC):c.3940C>T (p.Arg324Ter)                  | 15           | Pathogenic                                                             |
| 095     | Index Patient        | APC      | NM_000038.6                | 5   | 11283900   | c.1619_1620del | p.Gln14Aspfs*9           | GG           | T          | Insertion         | frameshift    | Het      | False                     | 2584191                                 | NM_000038.6(APC):c.1619_1620del (p.Gln14fs)               | 1            | Pathogenic                                                             |
| 096     | Index Patient        | APC      | NM_000038.6                | 5   | 11283967   | c.4025dup      | p.Leu1342Phefs*12        | GG           | T          | Insertion         | frameshift    | Het      | False                     | 217976                                  | NM_000038.6(APC):c.4025dup (p.Leu1342fs)                  | 6            | Pathogenic                                                             |
| 097     | Index Patient        | APC      | NM_000038.6                | 5   | 11283940   | c.3815C>G      | p.Ser1272*               | C            | G          | SNV               | nonsense      | Het      | False                     | 217973                                  | NM_000038.6(APC):c.3815C>G (p.Ser1272Ter)                 | 6            | Pathogenic                                                             |
| 098     | Index Patient        | APC      | NM_000038.6                | 5   | 11283992   | c.4961dup      | p.Met321Aunfs*6          | C            | A          | Insertion         | frameshift    | Het      | False                     | 2774690                                 | NM_000038.6(APC):c.4961dup (p.Met321fs)                   | 1            | Pathogenic                                                             |
| 100     | Index Patient        | APC      | NM_000038.6                | 5   | 11283914   | c.3920T>A      | p.Ile1307Lys             | T            | A          | SNV               | missense      | Het      | False                     | 822                                     | NM_000038.6(APC):c.3920T>A (p.Ile1307Lys)                 | 53           | Conflicting classifications of pathogenicity; association; risk factor |
| 101     | Index Patient        | APC      | NM_000038.6                | 5   | 11284205   | c.6431T>C      | p.Leu2144Pro             | T            | C          | SNV               | nonsense      | Het      | False                     | 187631                                  | NM_000038.6(APC):c.6431T>C (p.Leu2144Pro)                 | 5            | Uncertain significance                                                 |
| 102     | Index Patient        | APC      | NM_000038.6                | 5   | 11283922</ |                |                          |              |            |                   |               |          |                           |                                         |                                                           |              |                                                                        |





**SUPPLEMENTARY TABLE S3**

| <b>studyld</b>                   | <b>novel_pos</b> | <b>n_hits</b> |
|----------------------------------|------------------|---------------|
| msk_chord_2024                   | 1367             | 101           |
| msk_chord_2024                   | 1395             | 94            |
| msk_met_2021                     | 1367             | 72            |
| msk_met_2021                     | 1395             | 63            |
| pancan_pdmr_2025                 | 1367             | 41            |
| pancan_mimsi_msk_2024            | 1367             | 37            |
| pancan_mimsi_msk_2024            | 1395             | 36            |
| pancan_pdmr_2025                 | 1395             | 33            |
| msk_chord_2024                   | 1455             | 32            |
| crc_eo_2020                      | 1367             | 31            |
| rectal_msk_2022                  | 1395             | 26            |
| msk_met_2021                     | 1455             | 24            |
| crc_eo_2020                      | 1395             | 23            |
| crc_msk_2017                     | 1367             | 18            |
| crc_msk_2017                     | 1395             | 18            |
| pancan_mimsi_msk_2024            | 1455             | 17            |
| rectal_msk_2022                  | 1367             | 14            |
| coadread_dfc_i_2016              | 1395             | 13            |
| coadread_tcga_pan_can_atlas_2018 | 1395             | 12            |
| rectal_msk_2019                  | 1395             | 12            |
| crc_eo_2020                      | 1455             | 11            |
| crc_apc_impact_2020              | 1395             | 10            |
| coadread_dfc_i_2016              | 1367             | 9             |
| msk_chord_2024                   | 425              | 9             |
| coadread_tcga_pan_can_atlas_2018 | 1367             | 8             |
| msk_chord_2024                   | 985              | 8             |
| msk_met_2021                     | 985              | 7             |
| coad_tcga_gdc                    | 1367             | 6             |
| coad_tcga_gdc                    | 1395             | 6             |
| crc_apc_impact_2020              | 1367             | 6             |
| crc_msk_2017                     | 1455             | 6             |
| pancan_pdmr_2025                 | 1455             | 6             |
| coad_silu_2022                   | 1395             | 5             |
| pancan_mimsi_msk_2024            | 985              | 5             |
| rectal_msk_2019                  | 1367             | 5             |
| coad_tcga_gdc                    | 1455             | 4             |
| coadread_tcga                    | 1367             | 4             |
| coadread_tcga_pub                | 1367             | 4             |
| crc_apc_impact_2020              | 1455             | 4             |
| msk_chord_2024                   | 842              | 4             |
| msk_met_2021                     | 425              | 4             |

|                                  |      |   |
|----------------------------------|------|---|
| pancan_mimsi_msk_2024            | 425  | 4 |
| prad_pik3r1_msk_2021             | 1455 | 4 |
| read_tcga_gdc                    | 1367 | 4 |
| read_tcga_gdc                    | 1395 | 4 |
| rectal_msk_2022                  | 985  | 4 |
| coad_silu_2022                   | 1367 | 3 |
| coadread_dfcf_2016               | 1455 | 3 |
| coadread_tcga_pan_can_atlas_2018 | 1455 | 3 |
| prad_msk_stopsack_2021           | 1455 | 3 |
| prostate_msk_2024                | 1455 | 3 |
| tmb_mskcc_2018                   | 1395 | 3 |
| coad_cptac_2019                  | 1367 | 2 |
| coad_cptac_gdc                   | 1367 | 2 |
| coad_tcga_gdc                    | 985  | 2 |
| coadread_cass_2020               | 1367 | 2 |
| coadread_mskcc                   | 1367 | 2 |
| coadread_mskcc                   | 1395 | 2 |
| coadread_tcga_pan_can_atlas_2018 | 425  | 2 |
| coadread_tcga_pan_can_atlas_2018 | 985  | 2 |
| crc_apc_impact_2020              | 985  | 2 |
| crc_eo_2020                      | 985  | 2 |
| crc_msk_2017                     | 425  | 2 |
| msk_access_2021                  | 1455 | 2 |
| msk_ctdna_vte_2024               | 1455 | 2 |
| msk_met_2021                     | 842  | 2 |
| nslc_ctdx_msk_2022               | 1455 | 2 |
| pancan_mimsi_msk_2024            | 842  | 2 |
| pancan_pcawg_2020                | 1395 | 2 |
| prad_cdk12_mskcc_2020            | 1455 | 2 |
| rectal_msk_2019                  | 1455 | 2 |
| rectal_msk_2022                  | 425  | 2 |
| stad_tcga_pub                    | 1455 | 2 |
| tmb_mskcc_2018                   | 1367 | 2 |
| blca_msk_tcga_2020               | 985  | 1 |
| blca_tcga_gdc                    | 985  | 1 |
| blca_tcga_pan_can_atlas_2018     | 985  | 1 |
| blca_tcga_pub_2017               | 985  | 1 |
| brca_tcga                        | 425  | 1 |
| brca_tcga_pub2015                | 425  | 1 |
| coad_caseccc_2015                | 1395 | 1 |
| coad_cptac_2019                  | 842  | 1 |
| coad_cptac_2019                  | 1455 | 1 |
| coad_cptac_gdc                   | 842  | 1 |
| coad_cptac_gdc                   | 1455 | 1 |

|                              |      |   |
|------------------------------|------|---|
| coad_silu_2022               | 425  | 1 |
| coad_silu_2022               | 1455 | 1 |
| coad_tcga_gdc                | 425  | 1 |
| coadread_cass_2020           | 985  | 1 |
| coadread_cass_2020           | 1395 | 1 |
| coadread_dfc_2016            | 425  | 1 |
| coadread_dfc_2016            | 842  | 1 |
| coadread_genentech           | 1367 | 1 |
| coadread_tcga                | 985  | 1 |
| coadread_tcga                | 1395 | 1 |
| coadread_tcga                | 1455 | 1 |
| coadread_tcga_pub            | 985  | 1 |
| coadread_tcga_pub            | 1395 | 1 |
| coadread_tcga_pub            | 1455 | 1 |
| crc_dd_2022                  | 1455 | 1 |
| crc_eo_2020                  | 425  | 1 |
| crc_eo_2020                  | 842  | 1 |
| crc_hta11_htan_2021          | 985  | 1 |
| crc_msk_2017                 | 985  | 1 |
| crc_nigerian_2020            | 1455 | 1 |
| crc_orion_2024               | 1395 | 1 |
| egc_msk_2023                 | 1455 | 1 |
| kich_tcga                    | 425  | 1 |
| msk_chord_2024               | 817  | 1 |
| msk_ctdna_vte_2024           | 1367 | 1 |
| pancan_pcawg_2020            | 985  | 1 |
| prad_mcspc_mskcc_2020        | 1455 | 1 |
| prad_pik3r1_msk_2021         | 817  | 1 |
| prad_pik3r1_msk_2021         | 842  | 1 |
| prostate_msk_2024            | 817  | 1 |
| prostate_msk_2024            | 842  | 1 |
| read_tcga_gdc                | 425  | 1 |
| read_tcga_gdc                | 1455 | 1 |
| rectal_msk_2019              | 985  | 1 |
| rectal_msk_2022              | 1455 | 1 |
| rectal_radiation_msk_2024    | 1367 | 1 |
| stad_tcga                    | 1455 | 1 |
| stad_tcga_gdc                | 1455 | 1 |
| stad_tcga_pan_can_atlas_2018 | 1455 | 1 |
| stes_tcga_pub                | 1455 | 1 |
| tmb_mskcc_2018               | 425  | 1 |
| tmb_mskcc_2018               | 1455 | 1 |

## Supplementary Table S4

| Oligo name  | Region (1) | Forward (5'→3')           | Reverse (5'→3')           | Fragment size (bp) |
|-------------|------------|---------------------------|---------------------------|--------------------|
| APCex2      | Exon 2     | TTTCTTTAAAAACAAGCAGCCA    | CACAGAAAACCTTGCCTCAG      | 519                |
| APCex3      | Exon 3     | AAGGTGCGTGCTTTGAGAGT      | ACCAACACCCAAATCGAGAG      | 308                |
| APCex4      | Exon 4     | CCAAGTGGACTTTTCAGGGA      | CTGGAGTACACAAGGCAATGTT    | 412                |
| APCex5      | Exon 5     | GCTCTTCTGCAGTCTTTATTAGCA  | CCTAGTTGAACCCTGAGGTCC     | 444                |
| APCex6      | Exon 6     | AAGCCACTTGTGACTTTGGC      | GTTGCTCAGCAGCCATGATA      | 511                |
| APCex7      | Exon 7     | TGCGGTGAGCTGAGATTATG      | ACCCACAAACAAGAAAGGCA      | 376                |
| APCex8      | Exon 8     | GCAGCTCTAATGCTCAAGGG      | TGGTACTGAATGCTTCTGGAAA    | 465                |
| APCex9      | Exon 9     | CCATTCTGCAGTTTAATGCTCA    | TAGAGATGGGGTTTTGCCAC      | 512                |
| APCex10     | Exon 10    | CTGGAAGGTTTTCCGGTTT       | TGCTTTGAAACATGCACTACG     | 577                |
| APCex11     | Exon 11    | GTCAAGGGCAGATGAGTGGT      | TTCTATGCTGGAACCAGGG       | 511                |
| APCex12     | Exon 12    | TTGTCTTTTTCTCTTGCCC       | AGCGAATGTGAAGCACAGGT      | 362                |
| APCex13     | Exon 13    | CCTGTTGCTTATCATTCTCACC    | AGAGTGAGACCCTGCCTCAA      | 391                |
| APCex14     | Exon 14    | CAGCCTCCCAAAGTGATAGG      | ATGGCTAAAAGAAGGCAGCA      | 341                |
| APCex15     | Exon 15    | AGGGACGGGCAATAGGATAG      | CATTGCTTACAATTAGGTCTTTTGA | 404                |
| APCex15_12  | Exon 16    | TACTGCATACACATTGTGACCTT   | CGAGGGTTTCATTTGACCTC      | 1040               |
| APCex15_34  | Exon 16    | CAATTTCACTAAGTCGGAAAATTCA | CTGCTTCCTGTGTGCTGCTGA     | 1085               |
| APCex15_516 | Exon 16    | GCTCCATCCAAGTTCTGCAC      | CATGGTTTGTCCAGGGCTAT      | 604                |
| APCex15_156 | Exon 16    | GGCATTATAAGCCCCAGTGA      | ACTTGGTTTCTTGCCACAG       | 585                |

(1) According to ensemble transcript ENST00000257430.9
